# Supplementary material
Source: PubMed Central journal article supplement (PMC7179281)
Supplement: AAC.02042-19-s0001.pdf [file AAC.02042-19-s0001.pdf]

Supplementary Table. Summary of the modifying Fos enzymes indexed in the NCBI databank

| Determinant | Accession number | Species                            | Nature of the enzyme      | Reference   |
|-------------|------------------|------------------------------------|---------------------------|-------------|
| FosA1       | M85195           | <i>Serratia marcescens</i>         | glutathione-S-transferase | 1           |
| FosA2       | EU487198         | <i>Enterobacter cloacae</i>        | glutathione-S-transferase | 2           |
| FosA3       | KT199757         | <i>Escherichia coli</i>            | glutathione-S-transferase | 3           |
| FosA4       | AB908992         | <i>Escherichia coli</i>            | glutathione-S-transferase | 4           |
| FosA5       | KP143090         | <i>Escherichia coli</i>            | glutathione-S-transferase | 5           |
| FosA6       | KU254579         | <i>Escherichia coli</i>            | glutathione-S-transferase | unpublished |
| FosA7       | LAPJ01000014     | <i>Salmonella enterica</i>         | glutathione-S-transferase | 6           |
| FosA8       | MN150127         | <i>Escherichia coli</i>            | glutathione-S-transferase | 7           |
| FosA9       | PRJEB32329       | <i>Escherichia coli</i>            | glutathione-S-transferase | 8           |
| FosB        | X54227           | <i>Staphylococcus epidermidis</i>  | bacillithiol transferase  | 9           |
| FosC        | Z33413.1         | <i>Pseudomonas. syringae</i>       | phosphotransferase        | 10          |
| FosC2       | AB522969.1       | <i>Escherichia coli</i>            | glutathione-S-transferase | 11          |
| FosD        | KC989517         | <i>Staphylococcus rostri</i>       | bacillithiol transferase  | unpublished |
| FosE        | AB901041         | <i>Pseudomonas aeruginosa</i>      | bacillithiol transferase  | unpublished |
| FosF        | AY294333         | <i>Pseudomonas aeruginosa</i>      | glutathione-S-transferase | 12          |
| FosG        | DQ112222         | <i>Achromobacter denitrificans</i> | glutathione-S-transferase | unpublished |
| FosH        | DQ342344         | <i>Pseudomonas aeruginosa</i>      | bacillithiol transferase  | unpublished |
| FosI        | CP003505         | <i>Mycobacterium abscessus</i>     | bacillithiol transferase  | unpublished |
| FosK        | AB917040         | <i>Acinetobacter soli</i>          | glutathione-S-transferase | 13          |
| FosL        | MN464149         | <i>Escherichia coli</i>            | glutathione-S-transferase | This study  |

#### References

- 1- Partridge SR, Hall RM. 2005. Gene cassettes potentially encoding fosfomycin resistance determinants Antimicrob Agents Chemother 49:860-861.
- 2- Xu H, Miao V, Kwong W, Xia R, Davies J. 2011. Identification of a novel fosfomycin resistance gene (*fosA2*) in *Enterobacter cloacae* from the Salmon River, Canada. Lett Appl Microbiol 52:427-429.

- 3- Tseng SP, Wang SF, Kuo CY, Huang JW, Hung WC, Ke GM, Lu PL. 2015. Characterization of fosfomycin resistant extended-spectrum  $\beta$ -lactamase-producing *Escherichia coli* isolates from human and pig in Taiwan PLoS One 10:e0135864.
- 4- Nakamura G, Wachino J, Sato N, Kimura K, Yamada K, Jin W, Shibayama K, Yagi T, Kawamura K, Arakawa Y. 2014. Practical agar-based disk potentiation test for detection of fosfomycin-nonsusceptible *Escherichia coli* clinical isolates producing glutathione-S-transferases. J Clin Microbiol 52:3175-3179.
- 5- Ma Y, Xu X, Guo Q, Wang P, Wang W, Wang M. 2015. Characterization of *fosA5*, a new plasmid-mediated fosfomycin resistance gene in *Escherichia coli*. Lett Appl Microbiol 60:259-264.
- 6- Rehman MA, Yin X, Persaud-Lachhman MG, Diarra MS. 2017. First detection of a Fosfomycin resistance gene, *fosA7*, in *Salmonella enterica* serovar Heidelberg isolated from broiler chickens. Antimicrob Agents Chemother 61;pii:e00410-17.
- 7- Poirel L, Vuillemin X, Kieffer N, Mueller L, Descombes MC, Nordmann P. 2019. Identification of FosA8, a plasmid-encoded fosfomycin resistance determinant from *Escherichia coli* and its origin in *Leclercia adecarboxylata*. Antimicrob Agents Chemother 63:e01403-19.
- 8- Ten Doesschate T, Abbott IJ, Willems RJL, Top J, Rogers MRC, Bonten MM, Paganelli FL. 2019. In vivo acquisition of fosfomycin resistance in *Escherichia coli* by *fosA* transmission from commensal flora. J Antimicrob Chemother 74:3630-3632.
- 9- Zilhao R, Courvalin P. 1990. Nucleotide sequence of the *fosB* gene conferring fosfomycin resistance in *Staphylococcus epidermidis* FEMS Microbiol Lett 68:267-272.
- 10- Garcia P, Arca P, Evaristo Suarez J. 1995. Product of *fosC*, a gene from *Pseudomonas syringae*, mediates fosfomycin resistance by using ATP as cosubstrate. Antimicrob Agents Chemother 39:1569-1573.
- 11- Wachino J, Yamane K, Suzuki S, Kimura K, Arakawa Y. 2010. Prevalence of fosfomycin resistance among CTX-M-producing *Escherichia coli* clinical isolates in Japan and identification of novel plasmid-mediated fosfomycin-modifying enzymes. Antimicrob Agents Chemother 54:3061-3064.

- 12- Yatsuyanagi J, Saito S, Harata S, Suzuki N, Ito Y, Amano K, Enomoto K. 2004. Class 1 integron containing metallo- $\beta$ -lactamase gene *bla*<sub>VIM-2</sub> in *Pseudomonas aeruginosa* clinical strains isolated in Japan. *Antimicrob Agents Chemother* 48:626-628.
- 13- Kitanaka H, Wachino J, Jin W, Yokoyama S, Sasano MA, Hori M, Yamada K, Kimura K, Arakawa Y. 2014. Novel integron-mediated fosfomycin resistance gene *fosK*. *Antimicrob Agents Chemother* 58:4978-4979.

|       |              |                         |                                                                                     |
|-------|--------------|-------------------------|-------------------------------------------------------------------------------------|
| FosA1 | M85195       |                         | DOI: 10.1128/aac.34.10.2016                                                         |
| FosA2 | EU487198     |                         | doi: 10.1111/j.1472-765X.2011.03016.x. Epub 2011 Feb 21.                            |
| FosA3 | KT199757     |                         | doi: 10.1371/journal.pone.0135864. eCollection 201                                  |
| FosA4 | AB908992     |                         | doi: 10.1128/JCM.01094-14. Epub 2014 Jun 20.                                        |
| FosA5 | KP143090     |                         | doi: 10.1111/lam.12366. Epub 2014 Dec 21.                                           |
| FosA6 | KU254579     |                         | unpublished                                                                         |
| FosA7 | LAPJ01000014 |                         | doi: 10.1371/journal.pone.0128773. eCollection 2015.                                |
| FosA8 | MN150127     |                         | doi: 10.1128/AAC.01403-19. [Epub ahead of print]                                    |
| FosA9 | PRJEB32329   |                         | <a href="https://doi.org/10.1093/jac/dkz380">https://doi.org/10.1093/jac/dkz380</a> |
| FosB  | NC_014171.1  |                         | doi: 10.1128/JB.00562-10. Epub 2010 Jun 4.                                          |
| FosC  | Z33413.1     |                         | DOI: 10.1128/aac.39.7.1569                                                          |
| FosC2 | AB522969.1   |                         | DOI:10.1128/AAC.01834-09                                                            |
| FosD  | KC989517     | Staphylococcus rostri   | unpublished                                                                         |
| FosE  | AB901041     | pyo                     | unpublished                                                                         |
| FosF  | AY294333     | pyo                     | DOI:10.1128/aac.48.2.626-628.2004                                                   |
| FosG  | DQ112222     | Acr. Deni               | unpublished                                                                         |
| FosH  | DQ342344     | pyo                     | unpublished                                                                         |
| FosI  | CP003505     | Mycobacterium abscessus | unpublished                                                                         |
| FosK  | AB917040     | Acinetobacter soli      | 0.1128/AAC.03131-14                                                                 |
| FosL  | MN464149     | <i>E. coli</i>          | This study                                                                          |
